# Supplementary material
Source: Springer Nature journal article supplement (https://www.springermedizin.de/resource/supplementary/13032_2008_19_MOESM1_ESM.pdf/9651448)

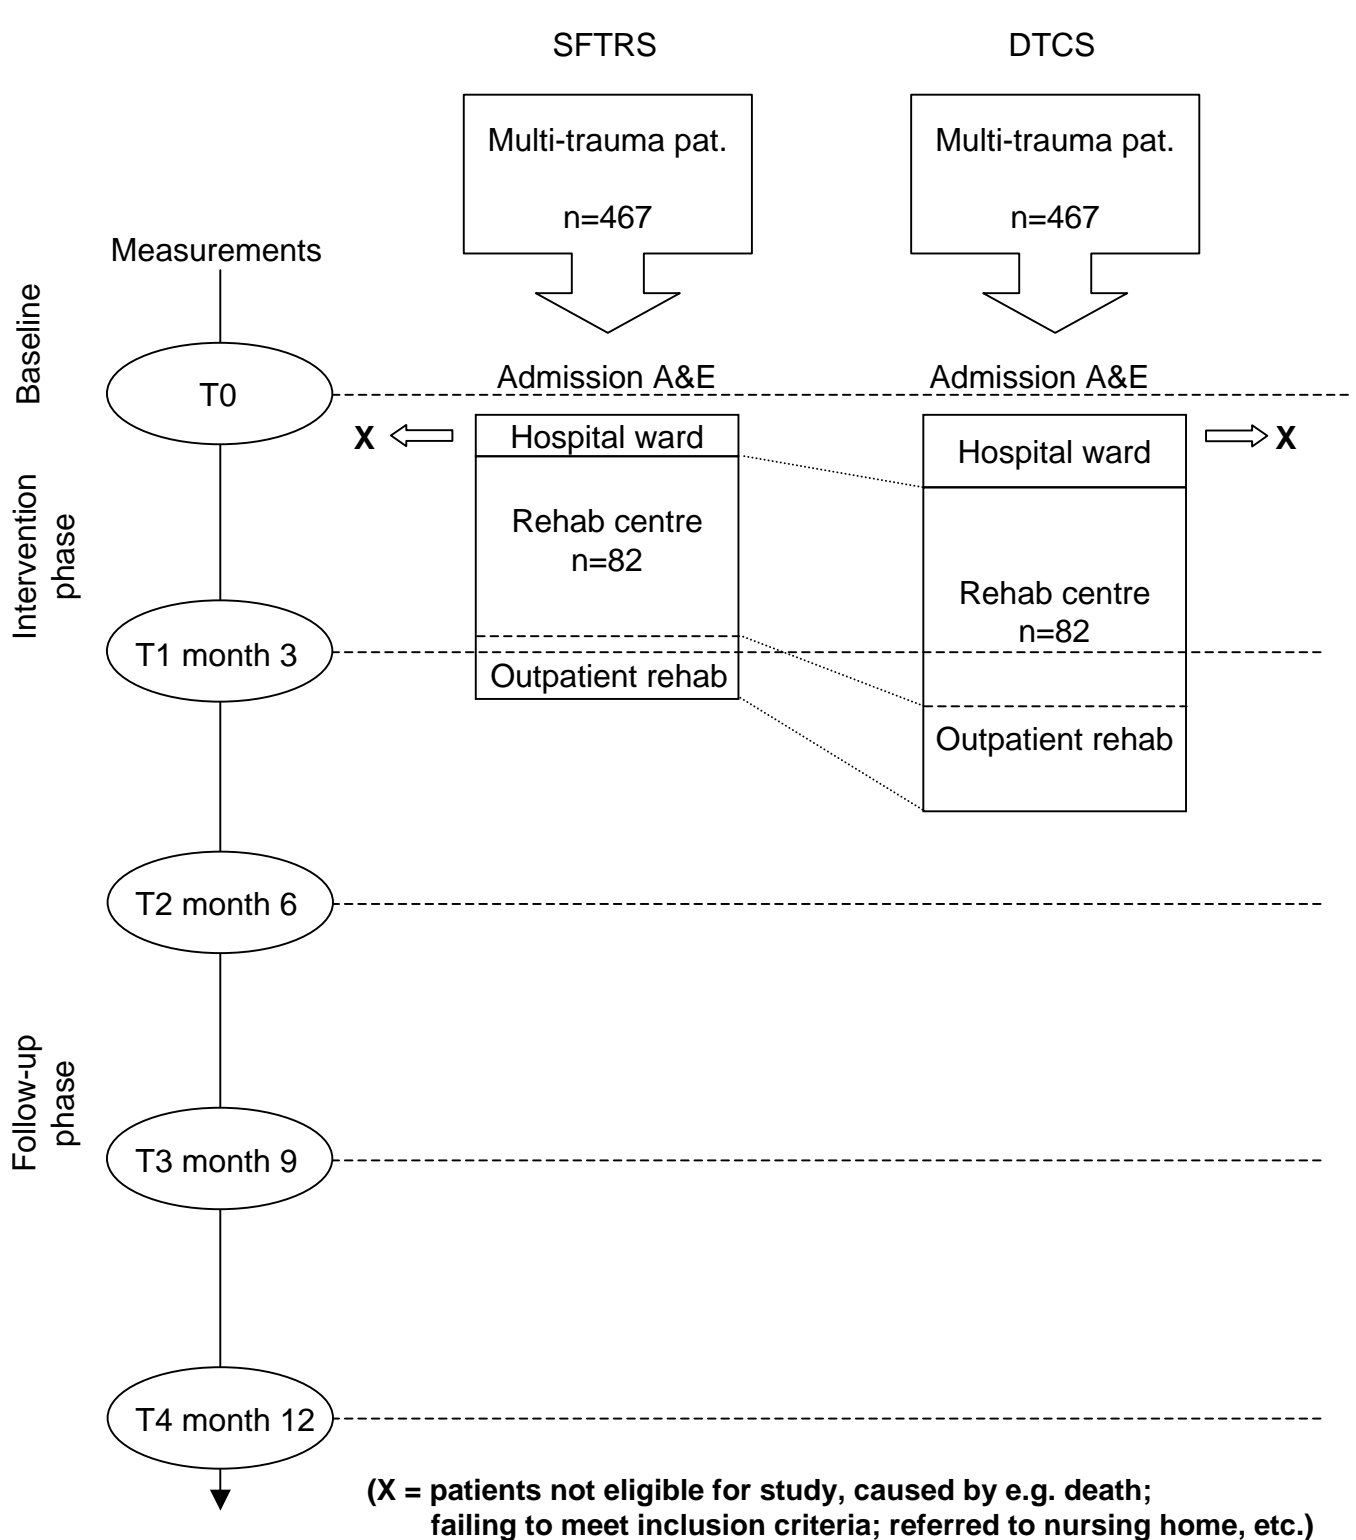

Supplement: MOESM1 [file 9651448]
